1     **An intranasally administrated SARS-CoV-2 beta variant subunit booster**  
2     **vaccine prevents beta variant viral replication in rhesus macaques**

3     Yongjun Sui<sup>1\*</sup>, Jianping Li<sup>1</sup>, Hanne Andersen<sup>2</sup>, Roushu Zhang<sup>3</sup>, Sunaina Kiran Prabhu<sup>3</sup>, Tanya  
4     Hoang<sup>1</sup>, David Venzon<sup>4</sup>, Anthony Cook<sup>2</sup>, Renita Brown<sup>2</sup>, Elyse Teow<sup>2</sup>, Jason Velasco<sup>2</sup>, Laurent  
5     Pessaint<sup>2</sup>, Ian N. Moore<sup>5</sup>, Laurel Lagenaur<sup>1</sup>, Jim Talton<sup>6</sup>, Matthew W. Breed<sup>7</sup>, Josh Kramer<sup>7</sup>,  
6     Kevin W. Bock<sup>5</sup>, Mahnaz Minai<sup>5</sup>, Bianca M. Nagata<sup>5</sup>, Hyoyoung Choo-Wosoba<sup>4</sup>, Mark G.  
7     Lewis<sup>2</sup>, Lai-Xi Wang<sup>3</sup>, Jay A. Berzofsky<sup>1\*</sup>

8     <sup>1</sup>Vaccine Branch, <sup>4</sup>Biostatistics and Data Management Section, Center of for Cancer Research,  
9     National Cancer Institute, NIH, Bethesda, MD 20892.

10    <sup>2</sup>BIOQUAL Inc., Rockville, MD 20850.

11    <sup>3</sup>Department of Chemistry and Biochemistry, University of Maryland, College Park, MD 20742

12    <sup>5</sup>Infectious Disease Pathogenesis Section, National Institute of Allergy and Infectious Diseases,  
13    Rockville, MD 20852

14    <sup>6</sup>Alchem Laboratories, Alachua, FL 32615

15    <sup>7</sup>Laboratory Animal Sciences Program, Frederick National Laboratory for Cancer Research,  
16    Bethesda, MD 20892

17

18

19    \*Correspondence to:

20    Yongjun Sui

21    Vaccine Branch, National Cancer Institute

22    National Institutes of Health

23    41 Medlars Drive, Bethesda, MD 20892 USA

24    Ph: 240-760-6726

25    Email: [suiy@mail.nih.gov](mailto:suiy@mail.nih.gov)

26    Jay A. Berzofsky,

27    Vaccine Branch, National Cancer Institute

28    National Institutes of Health

29    41 Medlars Drive, Bethesda, MD 20892 USA

30    Ph: 240-760-6148

31    Email: [berzofsj@mail.nih.gov](mailto:berzofsj@mail.nih.gov)

32

33    **Competing interests**

34    Authors declare no competing interests.

35 **ABSTRACT**

36 Emerging of SARS-CoV-2 variants and waning of vaccine/infection-induced immunity  
37 poses threats to curbing the COVID-19 pandemic. An effective, safe, and convenient booster  
38 vaccine will be needed. We hypothesized that a variant-modified mucosal booster vaccine might  
39 induce local immunity to prevent SARS-CoV-2 infection at the port of entry. The beta-variant is  
40 hardest to cross-neutralize. Herein we assessed the protective efficacy of an intranasal booster  
41 composed of beta variant-spike protein S1 with IL-15 and TLR agonists in previously  
42 immunized macaques. The macaques were first vaccinated with Wuhan strain S1 with the same  
43 adjuvant. One year later, negligibly detectable SARS-CoV-2-specific antibody remained.  
44 Nevertheless, the booster induced vigorous humoral immunity including serum- and  
45 bronchoalveolar lavage (BAL)-IgG, secretory nasal- and BAL-IgA, and neutralizing antibody  
46 against the original strain and/or beta variant. Beta-variant S1-specific CD4<sup>+</sup> and CD8<sup>+</sup> T cell  
47 responses were also elicited in PBMC and BAL. Following SARS-CoV-2 beta variant  
48 challenge, the vaccinated group demonstrated significant protection against viral replication in  
49 the upper and lower respiratory tracts, with almost full protection in the nasal cavity. The fact  
50 that one intranasal beta-variant booster administered one year after the first vaccination  
51 provoked protective immunity against beta variant infections may inform future SARS-CoV-2  
52 booster design and administration timing.

53 Key words: SARS-CoV-2, Beta variant, booster vaccine, adjuvanted subunit vaccine, intranasal  
54 mucosal vaccine, vaccine development, mucosal immunity

55

## 56 INTRODUCTION

57 Emergence of novel SARS-CoV-2 variants of concern (VOC) threatens the efforts to  
58 curb the COVID-19 pandemic. Some variants demonstrated significantly reduced neutralization  
59 sensitivity to sera from convalescent and vaccinated individuals. A recent study assessed the  
60 cross-reactive neutralizing responses to different variants including B.1.1.7 (Alpha), B.1.351  
61 (Beta), P.1 (Gamma), B.1.429 (Epsilon), B.1.526 (Iota), and B.1.617.2 (Delta) in mRNA-1273  
62 vaccinated individuals, and found that the beta variant had the lowest antibody recognition <sup>1</sup>. To  
63 date, the beta variant seems to be one of the most resistant variants to convalescent and  
64 vaccinated sera <sup>1,2</sup>. This variant was first detected in South Africa in October 2020 from samples  
65 collected at Eastern Cape Province in early August <sup>3,4</sup>. Since then, it quickly spread within South  
66 Africa and to the other parts of the world. By December 2020, it spread all over the world,  
67 accounted for 87% of viruses sequenced in South Africa, and became the dominant strain in  
68 Zambia <sup>4,5</sup>. Multiple mutations were found in this variant with K417N, E484K, N501Y as key  
69 substitutions <sup>6</sup>. It had 5-fold enhanced affinity to ACE2 compared to the original virus <sup>7</sup>, and a  
70 3.5-fold <sup>8</sup>, and a 10-fold <sup>2</sup> reduction in neutralization ability in convalescent and vaccinated  
71 individuals. Two studies have showed that the beta variant can partially or completely escaped  
72 three classes of therapeutically relevant antibodies and the convalescent sera <sup>9,10</sup>.

73 Meanwhile, waning immunity after vaccination has led to a gradual decline of vaccine  
74 efficacy against SARS-CoV-2 infections <sup>11-13 14,15</sup>. Recently, more SARS-CoV-2 breakthrough  
75 infections in vaccinated individuals, and resurgence of SARS-CoV-2 cases in some countries  
76 have been observed. Based on the previous experience with other coronaviruses and the current  
77 situation, an extra booster with the original Pfizer-BioNTech mRNA vaccine after 6-months of  
78 the first vaccination has been authorized in some countries among individuals with older age,

79 high risk for severe COVID-19, or high risk for SARS-CoV-2 infections due to occupational or  
80 institutional exposure<sup>16</sup>. For the general population, it is anticipated that a booster, ideally  
81 targeting circulating viral variants, will be needed, when the immunity induced by the original  
82 vaccine cannot provide adequate protection against the circulating viral variants<sup>17</sup>. Since a large  
83 number of individuals have been vaccinated with the vaccines comprised of antigens from the  
84 SARS-CoV-2 original Wuhan strain, data on immunogenicity and protective efficacy of a variant  
85 booster to vaccinees, who have previously received the original vaccines, would be urgently  
86 needed<sup>18,19</sup>. Recent studies have shown that intranasal administration of different platforms of  
87 SARS-CoV-2 vaccines induce protective immunity in preclinical animal models<sup>20-24</sup>.

88         Herein we performed a proof-of-concept study to test the immunogenicity and efficacy of  
89 an adjuvanted SARS-CoV-2 beta variant subunit booster in rhesus macaques that were  
90 vaccinated with the same vaccine platform except that the spike protein S1 was from the original  
91 Wuhan strain. We found that one year after the first vaccination, almost no detectable immunity  
92 was present in these macaques. However, an intranasal booster with the adjuvanted beta variant  
93 S1 subunit vaccine induced vigorous humoral and cellular immunity against both original and  
94 beta variant antigens. Most importantly, secretory IgA responses against S1 from both the  
95 original Wuhan strain and the beta variant were detected in the nasal cavity, which was  
96 consistent with the almost full protection we observed against the beta variant in the nasal cavity  
97 after viral challenge. Whether this mucosal vaccine can protect against viral transmission, and  
98 whether the mucosal IgA response is responsible for the protection in the nasal cavity merits  
99 further investigation. Importantly, our data showed that the one-year intranasal booster with  
100 beta variant S1 protein reinvigorated SARS-CoV-2-specific immune responses and led to  
101 significant protection against beta variant challenge. This study may provide important

102 information regarding the timing of booster immunizations and the type of antigens included in  
103 the booster.

## 104 **RESULTS**

### 105 **Robust systemic and mucosal humoral responses against S1 from the original Wuhan** 106 **strain and beta variant were elicited after intranasal variant booster**

107 In this study, we took advantage of five Indian rhesus macaques that had been vaccinated  
108 one year earlier with S1 protein from the original Wuhan strain (Supplementary Table 1). The  
109 vaccine included 100 µg of S1 and CP15 adjuvant, which was composed of IL-15 and TLR  
110 agonists (CpG and Poly I:C) incorporated in PLGA nanoparticles as used in our previous study  
111 <sup>20</sup>. The macaques were first primed with the vaccine intramuscularly (IM) at week 0, and then  
112 boosted with the same vaccine intranasally (IN) at week 3 and week 6 (Figure 1). 100 µg of S1  
113 per dose was used based on our previous HIV and SARS-CoV-2 vaccine studies <sup>20,25</sup>. S1 with  
114 sequence of the original Wuhan strain was used in the first three vaccinations. When evaluating  
115 the S1-specific IgG antibody responses, we found that this vaccine regimen induced a moderate  
116 level of humoral immune responses in serum and BAL fluid (Figure 2a). Compared to the ID50  
117 of 25, 209 induced by IM-primed and -boosted alum-adjuvanted subunit vaccine <sup>20</sup>, the peak  
118 median serum ID50 was only 945 (Figure 2a). Moreover, the vaccine-induced immunity also  
119 waned with time. After one year, the IgG responses in the vaccinated animals were comparable  
120 to those of the naïve controls (Figure 2a).

121 We then gave the animals one intranasal booster with S1 from beta variant adjuvanted  
122 with CP15 in DOTAP nanoparticles. After the booster, significant anamnestic responses were  
123 elicited. The Log ID50 of serum IgG titer reached 5.83 for the original Wuhan strain, and 5.08  
124 for the beta variant, compared to the highest IgG titer of 2.77 logs at 2 weeks post the 3<sup>rd</sup>  
125 vaccination one year earlier (Figure 2a). The booster also led to the induction of a substantial

126 increase of mucosal IgG against both the original Wuhan strain and the beta variant S1 in BAL  
127 (Figure 2a).

128 High titers of live virus neutralization antibody (Nab) responses against both WA1/2020  
129 D614G SARS-CoV-2 (WA) strain and the beta variant were detected in the serum. The  
130 geometric mean titers (GMT) of Nab were 434 and 540 for ID50, and 60 and 145 for ID90 for  
131 the WA strain and the beta variant, respectively (Figure 2b). Given the fact that the beta variant  
132 has been the most difficult strain to neutralize so far <sup>1</sup>, boosting with beta variant S1 might  
133 account for this improvement and suggest the potential benefit of switching antigens from the  
134 original WA strain to a variant. It is noteworthy that boosting with the variant S1 still induced a  
135 strong anamnestic response against the original priming Wuhan S1.

136 IgA and dimeric IgA responses in bronchoalveolar lavage (BAL) and nasal swabs were  
137 also examined, as IgA, especially dimeric IgA, displays high binding affinity to pathogens, and  
138 thus is more potent at preventing mucosal pathogen infections <sup>26,27</sup>. Right before the one-year  
139 booster, no S1 (original or beta variant)-specific IgA, or dimeric IgA responses were detected,  
140 and the antibody titers were comparable to the basal levels of naïve animals (Figure 2c).  
141 Consistent with IgG and neutralization responses, the one-year booster enhanced IgA responses  
142 in nasal swab and BAL samples with similar antibody titers against S1 from the original strain  
143 and the beta variant (Figure 2c). However, dimeric IgA responses against beta variant were not  
144 induced in BAL samples, whereas dimeric IgA responses were observed in BAL against the  
145 Wuhan strain and in nasal swabs against both strains (Figure 2c).

146 Overall, our results showed that the one-year booster induced robust S1-specific antibody  
147 responses in serum and BAL, including potent neutralizing antibody responses in peripheral  
148 blood. Most importantly, mucosal IgA responses were induced in nasal swabs and BAL that

149 were comparable against both the original priming Wuhan strain and the beta variant, except  
150 dimeric IgA responses against beta variant in BAL.

### 151 **Correlations among different types of antibody responses**

152 We next assessed the spearman correlations among different types of antibody responses.  
153 First, PRNT titers against the WA strain and beta variant did not correlate with each other  
154 (Supplementary Table 2), consistent with the fact that these two viruses have different  
155 neutralization profiling. Neutralization against one strain does not guarantee the neutralization  
156 of the other. Interestingly, the serum IgG responses against S1 from the original Wuhan strain  
157 did not correlate with any of the other antibody measurements, including serum IgG titer against  
158 the beta variant (Supplementary Table 2). In contrast, mucosal antibody responses, including  
159 S1-specific BAL IgG, IgA and dimeric IgA responses in nasal swabs, IgA responses in BAL,  
160 showed correlations or trends of correlations between the original Wuhan strain and beta variant  
161 (Supplementary Table 2 and Supplementary Figure 2). Moreover, the serum IgG titers against  
162 the beta variant were positively correlated (or showed trends of correlations) with BAL IgG and  
163 IgA, serum PRNT, and nasal dimeric IgA responses (Supplementary Table 2 and Supplementary  
164 Figure 2). These correlations suggested that the repertoire of systemic and mucosal humoral  
165 response against the original Wuhan strain and the beta variant were different after  
166 administration of the beta variant S1 one-year booster, even though the geometric mean titers  
167 against the Wuhan strain and beta variant were generally similar.

### 168 **Variant S1-specific cellular responses were induced after the one-year booster**

169 The vaccine-induced S1-specific T cell responses in PBMC and BAL samples of the  
170 vaccinated animals were evaluated by intracellular cytokine staining. S1-specific type 1 helper T  
171 cell responses (Th1) and CD8<sup>+</sup> T cell that secrete tumor necrosis factor (TNF)- $\alpha$ , and/or



172 interferon (IFN)- $\gamma$  were induced after the first vaccination (Figure 3). Though the responses  
173 were persistent in most of the vaccinated animals, no further enhancement of the responses was  
174 observed after the second and third vaccinations. For CD8<sup>+</sup> T cell responses, especially the  
175 responses in PBMC, we observed a declining trend with each vaccination (less so in BAL). This  
176 raises the concern that extensive boosters in a short period of time might burn out the SARS-  
177 CoV-2 -specific T cell responses. Nevertheless, the responses waned to under the detection limit  
178 in most of the animals after one year. After the administration of the one-year beta-variant  
179 booster, the S1-specific CD8<sup>+</sup> T cell responses were successfully recalled in all 5 PBMC samples  
180 and CD4<sup>+</sup> responses in 4/5 (Figure 3). Even though the route of the one-year booster was  
181 intranasal, S1-specific CD4<sup>+</sup> T cells were induced only in 3 BAL samples, and CD8<sup>+</sup> T cells in  
182 only two. One possibility could be the migration of antigen-specific T cell to the nasal cavity,  
183 while the other could be antigen-specific T cell exhaustion caused by multiple doses of vaccine.  
184 Both possibilities warrant further investigation.

185 As the frequencies of antigen-specific T cell responses were low, we further assessed the  
186 kinetics of total Th1 and Th2 subsets after stimulation with Phorbol 12-myristic 13-acetate  
187 (PMA) and ionomycin. There were no significant alterations after the first three vaccinations in  
188 the prior year (Supplementary Figure 1). However, the one-year boost resulted in sharp increase  
189 of Th1 responses in PBMC while the Th2 responses did not change (Supplementary Figure1).

### 190 **Vaccinated animals demonstrated significant protection in BAL, and almost full protection** 191 **in nasal swabs against SARS-CoV-2 beta variant replication**

192 To test the protective efficacy against SARS-CoV-2 beta variant, 5 vaccinated and 5  
193 naïve macaques were challenged with  $1.0 \times 10^5$  TCID<sub>50</sub> SARS-CoV-2 beta variant (isolate beta  
194 variant B.1.351, in-house generated stock from BEI Resources, NR-54974) through intranasal

195 (1mL) and intratracheal (1mL) routes 4 weeks after the last vaccination. Viral tissue culture  
196 infectious dose 50 titers (TCID<sub>50</sub>) were measured in the collected nasal swab and lung BAL  
197 samples. Replicating viruses were detected in both nasal swabs and BAL samples of all five  
198 naïve animals, indicating that the viral inoculation was successfully delivered and propagated in  
199 the upper and lower airways (Figure 4a). It is worth mentioning that the inoculation of SARS-  
200 CoV-2 beta variant led to prolonged detection of replicating virus in the nasal turbinate of the  
201 naïve animals. High levels of viral replication were present in all five naïve animals at day 7  
202 post virus challenge. In contrast, the vaccinated animals demonstrated almost full protection in  
203 nasal swabs: only one animal showed a small blip at day 2 post viral challenge, while four other  
204 vaccinated animals were free of replicating virus during the 7-days post-challenge period (Figure  
205 4a). The vaccinated group showed significant reduction of viral replication in both nasal  
206 turbinate and lungs compared to naïve controls, based on the area under the curves over all time  
207 points (Figure 4b). A future transmission study is needed to test whether this mucosal booster  
208 can prevent transmission.

### 209 **Histopathology in the lungs after viral infection confirmed the protection in lungs**

210 As reported in the previous study<sup>20</sup>, the mucosal vaccine is safe. Throughout the whole  
211 course of this study, we did not observe any adverse effects in the vaccinated animals. When the  
212 animals were necropsied on day 7, sections of lung were evaluated immunohistochemically for  
213 SARS-CoV-2 virus antigen and histologically for the presence of SARS-CoV-2 -associated  
214 inflammation. None of the 5 vaccinated animals demonstrated immunoreactivity to viral  
215 antigens, while virus antigens were detected in the lung sections of the 4 out of 5 animals in the  
216 control group (Figure 5a-b). Predominantly perivascular to interstitial inflammation was  
217 observed in the control group. An inflammation score was given to each animal blindly by a

218 certified pathologist based on the evaluation of lung infiltration collected at the time of necropsy  
219 at day 7 post SARS-CoV-2 challenges (Supplementary Table 3). The inflammation score was  
220 slightly more severe in the control group compared to the vaccinated group (Figure 5c),  
221 suggesting the vaccination prevented inflammation in the lungs.

## 222 DISCUSSION

223 An additional booster vaccine is likely needed to curb the resurgence of SARS-CoV-2  
224 cases. We demonstrated here that the one-year beta variant mucosal booster given intranasally  
225 elicited high quality immune responses and mediated protections against subsequent SARS-  
226 CoV-2 beta variant viral challenge in rhesus macaques. Notably, the protection in the upper  
227 respiratory tract was better than in the lower respiratory tract, which is different from most of the  
228 systemic vaccines<sup>28-31</sup>. The nearly full protection against viral replication in the nasal cavity is  
229 especially encouraging, indicating its potential to prevent viral spread and transmission. The  
230 nasal mucosa is the first site of infection, so the local immunity might be able to abort viral  
231 replication here before it disseminates systemically and may also prevent spread to other  
232 individuals. Indeed, we found that high titers of mucosal IgA responses against both original and  
233 variant spike proteins were induced in the nasal mucosa, which might account for the efficient  
234 clearing of the virus in situ. These findings show the promise of a nasal mucosal vaccine as a  
235 booster rather than another systemic (IM) vaccine dose.

236 Waning immunity over time after vaccination/infection is contributing significantly to the  
237 resurgence of SARS-CoV-2 cases<sup>14,15,32</sup>. Though the immune correlates of protection have not  
238 been fully established, neutralizing antibody (Nab) responses are believed to be one of the major  
239 protective mechanisms<sup>33-35</sup>. To evaluate the durability, one study found that the half-life of Nab  
240 was biphasic, with a rapid initial decline over 61 days, and then a more gradual tapering after the  
241 first 2 months out to 104 days<sup>36</sup>, while the other study found that Nab exhibited a bi-phasic  
242 decay with an extended half-life of >200 days<sup>37</sup>. Though prolonged humoral and cellular  
243 immunity up to 10 months or one year has been reported in SARS-CoV-2-convalescent

244 individuals<sup>38-40</sup>, the durability of the protective immunity against SARS-CoV-2 infection  
245 remains unknown.

246 The emergence of SARS-CoV-2 variants of concern might partially account for the  
247 reported decreased vaccine effectiveness after 6 months<sup>12,41</sup>. These variants either have high  
248 infectious potency or evade the immunity induced by SARS-CoV-2 infection or vaccination.  
249 The beta variant has the greatest immune evasive capacity among the widespread variants  
250 detected to date<sup>1</sup>. In this study, we have switched the S1 from original Wuhan strain to that of  
251 the beta variant, which led to successful elicitation of systemic and mucosal immune responses  
252 against both the original strain and the beta variant, and most importantly mediated protection  
253 against subsequent SARS-CoV-2 beta variant challenge. Incorporating S1 from the beta variant  
254 into the booster vaccine might account for the observed robust protection.

255 A dramatic increase in antibody titers after the one-year booster was observed (more than  
256 3 log of increase compared to the highest titers one year before for serum IgG titers). This is  
257 consistent with what we have found in a previous study, where the booster at 4 months induced  
258 much higher quality SARS-CoV-2 specific immune responses than the booster at 3 weeks did<sup>20</sup>.  
259 It appears that the longer interval between the booster and the previous vaccinations enhances the  
260 immune responses. Similar phenomena were reported in AstraZeneca (AZ) and inactivated  
261 vaccine trials, as well as in the standard hepatitis B viral vaccine regimen. In the AZ trial, a  
262 longer prime-boost interval (>12 weeks) led to higher vaccine efficacy compared to shorter  
263 interval (<6 weeks)<sup>42</sup>. In an inactivated vaccine trial, 6 or more months between the second and  
264 third vaccinations also induced a remarkable increase in antibody levels compared to a 4-week  
265 interval<sup>43</sup>. Thus, these studies should be taken into consideration when deciding the timing of an  
266 additional booster.

267           The CP15 adjuvanted vaccine described here was not very effective as a prime vaccine. It  
268           did not induce robust immune responses compared to an alum adjuvanted vaccine<sup>20</sup>. One year  
269           after the first vaccination, no virus-specific humoral or cellular immunity was detected.  
270           Nevertheless, the one-year booster elicited high quality immune responses, and mediated  
271           protection against subsequent beta variant challenge, which suggested that the vaccinations in the  
272           prior year generated persistent SARS-CoV-2 specific immune memory. Though the humoral and  
273           cellular immune responses waned to undetectable levels after one year, the immune memory  
274           persisted, which facilitated the later recall responses, when boosted. Moreover, our data suggest  
275           that a weaker variant-modified booster vaccine might be sufficient to induce protective immunity  
276           in previously vaccinated hosts. These findings may help guide future prime-boosting regimens  
277           for COVID-19.

278       **METHODS**

279       **Animals.** 10 Indian-origin adult male rhesus macaques (*Macaca mulatta*), 3-8 years old, were  
280       enrolled in the study. The animals tested seronegative for cercopithecine herpesvirus 1, SIV,  
281       simian type-D retrovirus, simian T lymphotropic virus type 1, and SARS-CoV-2 prior to study  
282       assignment.

283       **Vaccine design and inoculation.** Five macaques were included in the vaccine group, while five  
284       were in the SARS-CoV-2-naïve control group. The five naïve control animals had been exposed  
285       to HIV envelope protein/glycopeptide vaccination more than one year before. The five macaques  
286       in the vaccine group were primed at Week 0 (administrated IM) and boosted at Week 3  
287       (administered IN) and Week 6 (administered IN) with SARS-CoV-2 S1 protein (WA strain) with  
288       alum or CP15 adjuvant in PLGA nanoparticles. The CP15 adjuvant was composed of 200 µg per  
289       dose of D-type CpG oligodeoxynucleotide, 1 mg per dose of Poly I:C (InvivoGen), and 200 µg  
290       per dose of recombinant human IL-15 (Sino Biological). One year later, a boost was given to  
291       the remaining five animals with S1 protein from the beta variant adjuvanted with CP15. 100 µg  
292       of recombinant SARS-CoV-2 (2019-nCoV) spike S1 protein (Cat: 40591-V08H and 40591-  
293       V08H10, Sino Biological, endotoxin level: <0.001U/µg) was used per dose. S1 protein and  
294       CP15 were formulated in nanoparticles in PLGA (Alchem Laboratories) for the first 2 doses and  
295       the last (one-year) boost was in DOTAP (100 µl per dose; Roche). For immunization, the CP15  
296       adjuvanted vaccine was given either intramuscularly in 1ml of volume, or intranasally in a

297 volume of 50  $\mu$ l per nostril, while the animals were anesthetized. After vaccination, blood, nasal  
298 swab and BAL fluid samples were collected at the times noted and analyzed.

299 **Nasal swab and BAL sample collection.** Nasal secretions were collected and stored at  $-80^{\circ}\text{C}$   
300 after either using cotton-tipped swabs and then in 1 ml of PBS buffer containing 0.1% BSA,  
301 0.01% thimerosal, and 750 Kallikrein inhibitor units of aprotinin<sup>25</sup> for pre-challenge stage, or  
302 using Copan flocced swabs and in virus transport medium for post-challenge stage. BAL  
303 samples were collected as described before<sup>20</sup>. Briefly, while the animals were under anesthesia,  
304 up to 10 mL/kg of sterile saline were instilled into and sucked out of the lungs. Large pieces  
305 were removed by passing through a 100  $\mu$ m cell strainer (pre-challenge). The BAL fluid was  
306 collected after centrifugation and stored at  $-20^{\circ}\text{C}$  for analysis. The BAL cells were washed with  
307 R10 medium (RPMI-1640 with 10% fetal bovine serum) before subsequent treatment or  
308 cryopreservation.

309 **ELISA assay to detect S1-specific antibody responses.** The BAL samples were concentrated  
310 using Amicon Ultra centrifugal filter units (10kDa cutoff, *Millipore Sigma*), and the total IgG and  
311 IgA were determined using the Rhesus Monkey IgG-UNLB (*Southern Biotech*), and the Monkey  
312 IgA ELISA development kit (HRP) (MabTech) respectively, following the manufacturer's  
313 protocol as described before<sup>20</sup>. Nasal swab samples were put into 1 ml of 1XPBS buffer containing  
314 0.1% BSA, 0.01% thimerosal, and 750 Kallikrein inhibitor units of aprotinin (Sigma) and stored  
315 at  $-80^{\circ}\text{C}$ . Nasal swabs were thawed, and the recovered solution was passed through a  
316 5  $\mu$ m PVDF microcentrifugal filter unit (Millipore, Billerica, MA). The buffer flow-through was  
317 collected and stored at  $-20^{\circ}$  until analysis.

318 ELISA assays were run as described before<sup>20</sup>. The S1-specific binding assays were coated  
319 with 100 ng/well of the SARS-CoV-2 spike S1-His Recombinant Protein (Sino Biological) using



320 high-binding 96-well plates (Santa Cruz Biotechnology). After incubation at 4°C overnight, and  
321 1hr. blocking with 300 µL of 2% sodium casein in 1X PBS, the concentrated BAL samples (with  
322 a series of 2-fold dilutions starting from an IgA or IgG concentration of 2 µg/mL) or nasal swab  
323 samples, or serially diluted serum samples (4-fold starting from a 1:150 dilution) were applied in  
324 duplicate. After incubation at room temperature for 1 hr., the plates were washed four times.  
325 Subsequent steps of incubation with HRP-labeled secondary antibody and TMB substrate were  
326 followed as described before. For IgG and IgA binding assay, Goat Anti-Monkey IgG (alpha-  
327 chain specific)-HRP conjugate (1:5,000 dilutions, *Alpha Diagnostic*) and were used, respectively,  
328 as a secondary antibody. Area under the curve, endpoint titer, and ID50 values were calculated by  
329 GraphPad Prism 8 software with sigmoidal nonlinear regression. Dimeric IgA in BAL and nasal  
330 swabs was measured using DuoSet ELISA Ancillary Reagent Kit 2 (R&D Systems) as described  
331 before<sup>20</sup>. 100 ng/well of the SARS-CoV-2 spike S1 protein was coated and blocked. Original BAL  
332 samples or nasal swab flow-through from vaccinated and naïve animals were added in duplicate  
333 to the plates, followed by adding mouse anti-rhesus J chain [CA1L\_33e1\_A1a3] antibody (1:1000  
334 dilutions, *NIH nonhuman primate reagent resource*), and Goat anti-mouse IgG-HRP conjugate  
335 (1:10,000 dilutions, *R&D Systems*). Each step was followed by 1 hr. incubation at room  
336 temperature and five washes.

337 **Plaque reduction neutralization test (PRNT).** The PRNT was performed in duplicate as  
338 described before<sup>20</sup>. Vero E6 cells (ATCC, cat. no. CRL-1586), and 30 pfu challenge titers of  
339 SARS-CoV-2 virus USA-WA1/2020 strain or Vero TMPRSS2 cells (obtained from Dr. Adrian  
340 Creanga and Barney Graham, VRC, NIAID, Bethesda, MD) and same titer of the beta variant  
341 (B.1.351, SRA strain) was used to test the PRNT titers against the WA or beta variant of SARS-  
342 CoV-2<sup>44</sup>. Serum samples of 3-fold serial dilution starting from 1:20, and up to final dilution of

343 1: 4860 were incubated with 30 pfu of SARS-CoV-2 virus for 1 hr. at 37 °C. The serial  
344 dilutions of virus–serum mixtures were then added onto Vero E6 cell monolayers in cell culture  
345 medium with 1% agarose for 1 hr. at 37 °C with 5% CO<sub>2</sub>. The plates were fixed and stained  
346 after three days of culture. ID50 and ID90 were calculated as the highest serum dilution resulting  
347 in 50 and 90% reduction of plaques, respectively.

348 **Intracellular cytokine staining assay.** SARS-CoV-2-specific T cells were measured from BAL  
349 and PBMC samples by flow cytometric intracellular cytokine analysis, as previously described  
350 <sup>20,45,46</sup>. Briefly, 2 µg/ml of SARS-CoV-2 S1 protein (*Sino Biological*) for PBMC, and 5 µg/ml for  
351 BAL samples was incubated with cell samples at 37°C 5%CO<sub>2</sub> overnight in the presence of 0.15  
352 µg/ml of brefeldin A. Negative and positive controls were stimulated with medium-only (no S1  
353 protein) or with cell activation cocktail with PMA (20.25 pM) and ionomycin (335 pM) and 0.15  
354 µg/ml of brefeldin A (Biolegend). Cells were stained with viability dye (Invitrogen) and the  
355 following antibody mixtures: PE-Cy7-CD3, BV605-CD4, APC-Cy7-CD8, Alexa Fluor® 700-  
356 CD45 were from BD Biosciences, FITC-CD28, Pe-Cy5-CD95, BV711- TNFα, IFNγ-PE or -  
357 PerCP, Alexa Fluor® 647-IL4, BV785-IL2, BV421-IL-17A, BV785-CD14, BV421-CD16 were  
358 from Biolegend; PE-IL13 was from Miltenyi Biotech. Detailed antibody information is listed in  
359 the previous publication <sup>20</sup>. Data acquisition and analyses were performed using an LSRII flow  
360 cytometer with 4 lasers (BD Bioscience) and FlowJo software (Becton Dickinson). The antigen-  
361 specific T cell responses were reported as the frequencies of cytokine-positive cells in the  
362 samples stimulated with S1 protein minus those in the medium-only control.

363 **SARS-CoV-2 beta variant viral challenge.** Four weeks after the one-year boost, 5 vaccinated  
364 and 5 control animals were challenged with 1x10<sup>5</sup> pfu SARS-CoV-2 virus beta variant (seed

365 stock obtained from BEI Resources; NR-54974, B.1.351, SRA strain). The challenge stock was  
366 grown in Calu-3 cells and was deep sequenced, which confirmed the expected sequence identity  
367 with no mutations in the Spike protein greater than >2.5% frequency and no mutations elsewhere  
368 in the virus at >13% frequency. The same beta variant stock was used in the earlier macaque  
369 challenge study at the same facility<sup>28</sup>. To make sure that the virus was delivered to both upper  
370 and lower airway simultaneously, the diluted virus was given intranasally and intratracheally,  
371 each route with 1ml (0.5ml for each nostril). Nasal swab and BAL fluid samples were collected  
372 after challenge to measure the viral load.

373 **TCID50 assays to measure viral loads.** Vero TMPRSS2 cells (obtained from the Vaccine  
374 Research Center-NIAID) were plated at 25,000 cells/well in DMEM + 10% FBS + Gentamicin  
375 and the cultures were incubated at 37°C, 5.0% CO<sub>2</sub>. Cells should be 80 -100% confluent the  
376 following day. Medium was aspirated and replaced with 180 µL of DMEM + 2% FBS +  
377 gentamicin. Twenty (20) µL of sample was added to top row in quadruplicate and mixed using a  
378 P200 pipettor 5 times. Using the pipettor, 20 µL was transferred to the next row, and repeated  
379 down the plate (columns A-H) representing 10-fold dilutions. The tips were disposed for each  
380 row and repeated until the last row. Positive (virus stock of known infectious titer in the assay)  
381 and negative (medium only) control wells were included in each assay set-up. The plates were  
382 incubated at 37°C, 5.0% CO<sub>2</sub> for 4 days. The cell monolayers were visually inspected for  
383 CPE. Non-infected wells will have a clear confluent cell layer while infected cells will have cell  
384 rounding. The presence of CPE was marked on the lab form as a + and absence of CPE as -. The

385 TCID<sub>50</sub> value was calculated using the Read-Muench formula. For optimal assay performance,  
386 the TCID<sub>50</sub> value of the positive control should test within 2-fold of the expected value.

387 **Histopathology and immunohistochemistry of lung sections.** Seven days after SARS-CoV-2  
388 viral challenge all the animals were necropsied and the lung tissue specimens were collected,  
389 fixed, processed, and embedded in paraffin blocks and sectioned at a thickness of 5 µm as  
390 described in the previous study<sup>20</sup>. Briefly, hematoxylin and eosin (H&E) sections were  
391 examined under light microscopy and scored by a board-certified veterinary pathologist, who  
392 was blind to the groups. A rabbit polyclonal SARS-CoV-2 antibody (GeneTex) was used  
393 immunohistochemically to stain for the presence of SARS-CoV-2 virus antigen. An Olympus  
394 BX51 brightfield microscope was used, and representative photomicrographs were captured  
395 using an Olympus DP73 camera.

396 **Statistical analysis.** Prism version 8 (Graph Pad) was used for statistical analyses. Area under  
397 curve (AUC) values were calculated for viral load, and Mann-Whitney tests were used for group  
398 comparisons as shown in the figures. A P value less than 0.05 was considered significant, and all  
399 statistical tests were 2-tailed.

400 **Study approval.** Vaccination was performed at the National Institutes of Health NCI Animal  
401 Facility, Bethesda, MD, an American Association for the Accreditation of Laboratory Animal  
402 Care (AAALAC)-accredited facility with PHS Approved Animal Welfare Assurance (Assurance  
403 ID A4149-01). Animal Protocol No. VB-037 was approved by the NCI Animal Care and Use  
404 Committee (ACUC) to conduct the study. Two weeks before viral challenge, all 10 animals were  
405 moved to a qualified BSL3 facility at BIOQUAL, Inc.. The SARS-CoV-2 viral challenge study  
406 was approved and performed under BIOQUAL's IACUC approved Protocol No. 20-107.

407 **Acknowledgments**

408 This work was supported by funding from the Intramural Research Program, National Institutes  
409 of Health, National Cancer Institute, Center for Cancer Research funding Z01 BC-011941 to Jay  
410 A. Berzofsky. The NIH nonhuman primate reagent resource provided mouse anti-rhesus J chain  
411 antibody. The staff of the Laboratory Animal Sciences Program, Frederick National Laboratory  
412 for Cancer Research, provided technical support and animal care. The following reagent was  
413 deposited by the Centers for Disease Control and Prevention and obtained through BEI  
414 Resources, NIAID, NIH: SARS-Related Coronavirus 2, Isolate USA-WA1/2020, NR-53780 and  
415 Isolate beta variant B.1.351, NR-54974. We thank Shelby O'Connor for sequencing of the beta  
416 variant challenge stock.

417 The content of this publication does not necessarily reflect the views or policies of the  
418 Department of Health and Human Services, nor does mention of trade names, commercial  
419 products, or organizations imply endorsement by the U.S. Government.

420 **Author contributions**

421 YS, JAB designed and interpreted the project. YS, JL processed samples, ran cellular assays.  
422 JL, TH, RZ, SP, YS performed antibody assays. LP performed PRNT assays. JT, YS prepared  
423 the PLGA nanoparticle, and other vaccines. IM, KB, MM, BMN performed pathology. HA,  
424 AC, RB, ET, JV, MB, JK led the animal studies. YS, JAB, HA, LL, ML, LW participated in  
425 study design and interpreted the experiments. DV, HC and YS performed statistical analyses.  
426 YS and JAB wrote the manuscript with input from all the coauthors.

427

## References

- 428 1. Pegu, A., *et al.* Durability of mRNA-1273 vaccine-induced antibodies against SARS-  
429 CoV-2 variants. *Science* (2021).
- 430 2. Wang, P., *et al.* Increased Resistance of SARS-CoV-2 Variants B.1.351 and B.1.1.7 to  
431 Antibody Neutralization. *bioRxiv* (2021).
- 432 3. Tegally, H., *et al.* Detection of a SARS-CoV-2 variant of concern in South Africa. *Nature*  
433 **592**, 438-443 (2021).
- 434 4. Abdool Karim, S.S. & de Oliveira, T. New SARS-CoV-2 Variants - Clinical, Public  
435 Health, and Vaccine Implications. *N Engl J Med* **384**, 1866-1868 (2021).
- 436 5. Mwenda, M., *et al.* Detection of B.1.351 SARS-CoV-2 Variant Strain - Zambia,  
437 December 2020. *MMWR Morb Mortal Wkly Rep* **70**, 280-282 (2021).
- 438 6. Singh, J., *et al.* Structure-Function Analyses of New SARS-CoV-2 Variants B.1.1.7,  
439 B.1.351 and B.1.1.28.1: Clinical, Diagnostic, Therapeutic and Public Health Implications.  
440 *Viruses* **13**(2021).
- 441 7. Ramanathan, M., Ferguson, I.D., Miao, W. & Khavari, P.A. SARS-CoV-2 B.1.1.7 and  
442 B.1.351 Spike variants bind human ACE2 with increased affinity. *bioRxiv* (2021).
- 443 8. Edara, V.V., *et al.* Reduced binding and neutralization of infection- and vaccine-induced  
444 antibodies to the B.1.351 (South African) SARS-CoV-2 variant. *bioRxiv* (2021).
- 445 9. Wibmer, C.K., *et al.* SARS-CoV-2 501Y.V2 escapes neutralization by South African  
446 COVID-19 donor plasma. *bioRxiv* (2021).
- 447 10. Weisblum, Y., *et al.* Escape from neutralizing antibodies by SARS-CoV-2 spike protein  
448 variants. *Elife* **9**(2020).
- 449 11. Yair, *et al.* Waning immunity of the BNT162b2 vaccine: A nationwide study from Israel.  
450 *doi:*  
451 <https://doi.org/10.1101/2021.08.24.21262423> (2021).
- 452 12. Thomas, S.J., *et al.* Safety and Efficacy of the BNT162b2 mRNA Covid-19 Vaccine  
453 through 6 Months. *N Engl J Med* (2021).
- 454 13. Canaday, D.H., *et al.* Significant reduction in humoral immunity among healthcare  
455 workers and nursing home residents 6 months after COVID-19 BNT162b2 mRNA  
456 vaccination. *medRxiv*, 2021.2008.2015.21262067 (2021).
- 457 14. Levin, E.G., *et al.* Waning Immune Humoral Response to BNT162b2 Covid-19 Vaccine  
458 over 6 Months. *N Engl J Med* (2021).
- 459 15. Tartof, S.Y., *et al.* Effectiveness of mRNA BNT162b2 COVID-19 vaccine up to 6  
460 months in a large integrated health system in the USA: a retrospective cohort study.  
461 *Lancet* (2021).
- 462 16. Lavine, J.S., Bjornstad, O.N. & Antia, R. Immunological characteristics govern the  
463 transition of COVID-19 to endemicity. *Science* **371**, 741-745 (2021).
- 464 17. Krause, P.R., *et al.* Considerations in boosting COVID-19 vaccine immune responses.  
465 *Lancet* (2021).
- 466 18. Wu, K., *et al.* Variant SARS-CoV-2 mRNA vaccines confer broad neutralization as  
467 primary or booster series in mice. *bioRxiv* (2021).
- 468 19. Choi, A., *et al.* Safety and immunogenicity of SARS-CoV-2 variant mRNA vaccine  
469 boosters in healthy adults: an interim analysis. *Nature Medicine* (2021).
- 470 20. Sui, Y., *et al.* Protection against SARS-CoV-2 infection by a mucosal vaccine in rhesus  
471 macaques. *JCI Insight* **6**(2021).



- 472 21. Hassan, A.O., *et al.* A Single-Dose Intranasal ChAd Vaccine Protects Upper and Lower  
473 Respiratory Tracts against SARS-CoV-2. *Cell* **183**, 169-184 e113 (2020).
- 474 22. Wu, S., *et al.* A single dose of an adenovirus-vectored vaccine provides protection  
475 against SARS-CoV-2 challenge. *Nat Commun* **11**, 4081 (2020).
- 476 23. Ku, M.W., *et al.* Intranasal vaccination with a lentiviral vector protects against SARS-  
477 CoV-2 in preclinical animal models. *Cell Host Microbe* **29**, 236-249 e236 (2021).
- 478 24. Feng, L., *et al.* An adenovirus-vectored COVID-19 vaccine confers protection from  
479 SARS-COV-2 challenge in rhesus macaques. *Nat Commun* **11**, 4207 (2020).
- 480 25. Sui, Y., *et al.* Mucosal vaccine efficacy against intrarectal SHIV is independent of anti-  
481 Env antibody response. *J Clin Invest* **129**, 1314-1328 (2019).
- 482 26. Johansen, F.E. & Kaetzel, C.S. Regulation of the polymeric immunoglobulin receptor  
483 and IgA transport: new advances in environmental factors that stimulate pIgR expression  
484 and its role in mucosal immunity. *Mucosal Immunol* **4**, 598-602 (2011).
- 485 27. Cerutti, A., Chen, K. & Chorny, A. Immunoglobulin responses at the mucosal interface.  
486 *Annu Rev Immunol* **29**, 273-293 (2011).
- 487 28. Yu, J., *et al.* Protective efficacy of Ad26.COV2.S against SARS-CoV-2 B.1.351 in  
488 macaques. *Nature* (2021).
- 489 29. Corbett, K.S., *et al.* Evaluation of the mRNA-1273 Vaccine against SARS-CoV-2 in  
490 Nonhuman Primates. *N Engl J Med* **383**, 1544-1555 (2020).
- 491 30. Mercado, N.B., *et al.* Single-shot Ad26 vaccine protects against SARS-CoV-2 in rhesus  
492 macaques. *Nature* **586**, 583-588 (2020).
- 493 31. van Doremalen, N., *et al.* ChAdOx1 nCoV-19 vaccine prevents SARS-CoV-2 pneumonia  
494 in rhesus macaques. *Nature* **586**, 578-582 (2020).
- 495 32. Keehner, J., *et al.* Resurgence of SARS-CoV-2 Infection in a Highly Vaccinated Health  
496 System Workforce. *N Engl J Med* (2021).
- 497 33. Yu, J., *et al.* DNA vaccine protection against SARS-CoV-2 in rhesus macaques. *Science*  
498 **369**, 806-811 (2020).
- 499 34. Sui, Y., Bekele, Y. & Berzofsky, J.A. Potential SARS-CoV-2 Immune Correlates of  
500 Protection in Infection and Vaccine Immunization. *Pathogens* **10**(2021).
- 501 35. Corbett, K.S., *et al.* Immune Correlates of Protection by mRNA-1273 Immunization  
502 against SARS-CoV-2 Infection in Nonhuman Primates. *bioRxiv* (2021).
- 503 36. Xu, X., *et al.* Dynamics of neutralizing antibody responses to SARS-CoV-2 in patients  
504 with COVID-19: an observational study. *Signal Transduct Target Ther* **6**, 197 (2021).
- 505 37. Cohen, K.W., *et al.* Longitudinal analysis shows durable and broad immune memory  
506 after SARS-CoV-2 infection with persisting antibody responses and memory B and T  
507 cells. *Cell Rep Med* **2**, 100354 (2021).
- 508 38. Alsayb, M.A., *et al.* Prolonged humoral and cellular immunity in COVID-19-recovered  
509 patients. *Saudi J Biol Sci* (2021).
- 510 39. Dan, J.M., *et al.* Immunological memory to SARS-CoV-2 assessed for up to 8 months  
511 after infection. *Science* **371**(2021).
- 512 40. Feng, C., *et al.* Protective humoral and cellular immune responses to SARS-CoV-2  
513 persist up to 1 year after recovery. *Nat Commun* **12**, 4984 (2021).
- 514 41. Matan Levine-Tiefenbrun, I.Y., Hillel Alapi, Rachel Katz, Esma Herzel, Jacob Kuint,  
515 Gabriel Chodick, Sivan Gazit, Tal Patalon, Roy Kishony. Viral loads of Delta-variant  
516 SARS-CoV2 breakthrough infections following vaccination and booster with the  
517 BNT162b2 vaccine. *medRxiv*: doi: <https://doi.org/10.1101/2021.08.29.21262798> (2021).

- 518 42. Voysey, M., *et al.* Single-dose administration and the influence of the timing of the  
519 booster dose on immunogenicity and efficacy of ChAdOx1 nCoV-19 (AZD1222)  
520 vaccine: a pooled analysis of four randomised trials. *Lancet* **397**, 881-891 (2021).  
521 43. Pan, H., *et al.* Immunogenicity and safety of a third dose, and immune persistence of  
522 CoronaVac vaccine in healthy adults aged 18-59 years: interim results from a double-  
523 blind, randomized, placebo-controlled phase 2 clinical trial. *medRxiv*,  
524 2021.2007.2023.21261026 (2021).  
525 44. Perera, R.A., *et al.* Serological assays for severe acute respiratory syndrome coronavirus  
526 2 (SARS-CoV-2), March 2020. *Euro Surveill* **25**(2020).  
527 45. Lamoreaux, L., Roederer, M. & Koup, R. Intracellular cytokine optimization and  
528 standard operating procedure. *Nat Protoc* **1**, 1507-1516 (2006).  
529 46. Sui, Y., *et al.* Innate and adaptive immune correlates of vaccine and adjuvant-induced  
530 control of mucosal transmission of SIV in macaques. *Proc Natl Acad Sci U S A* **107**,  
531 9843-9848 (2010).  
532

533



**Figure 1. Schematic diagram of vaccination and viral challenge**

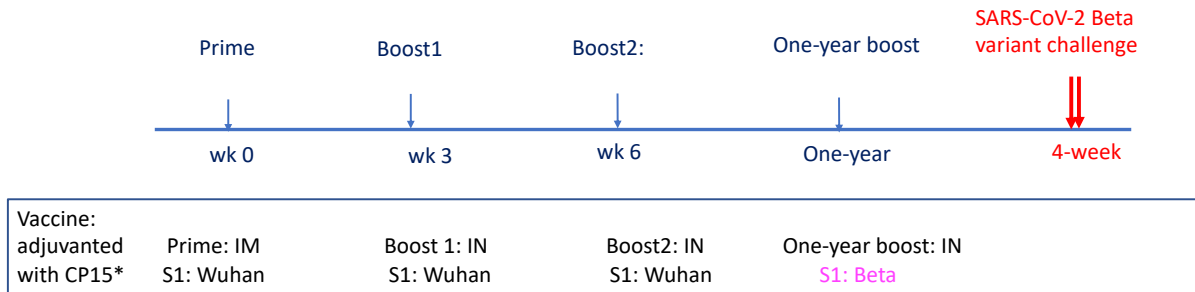

IM : intramuscular; IN : intranasal; wk: week

\*CP15: combination of CpG+poly I:C+ IL-15 in DOTAP or PLGA

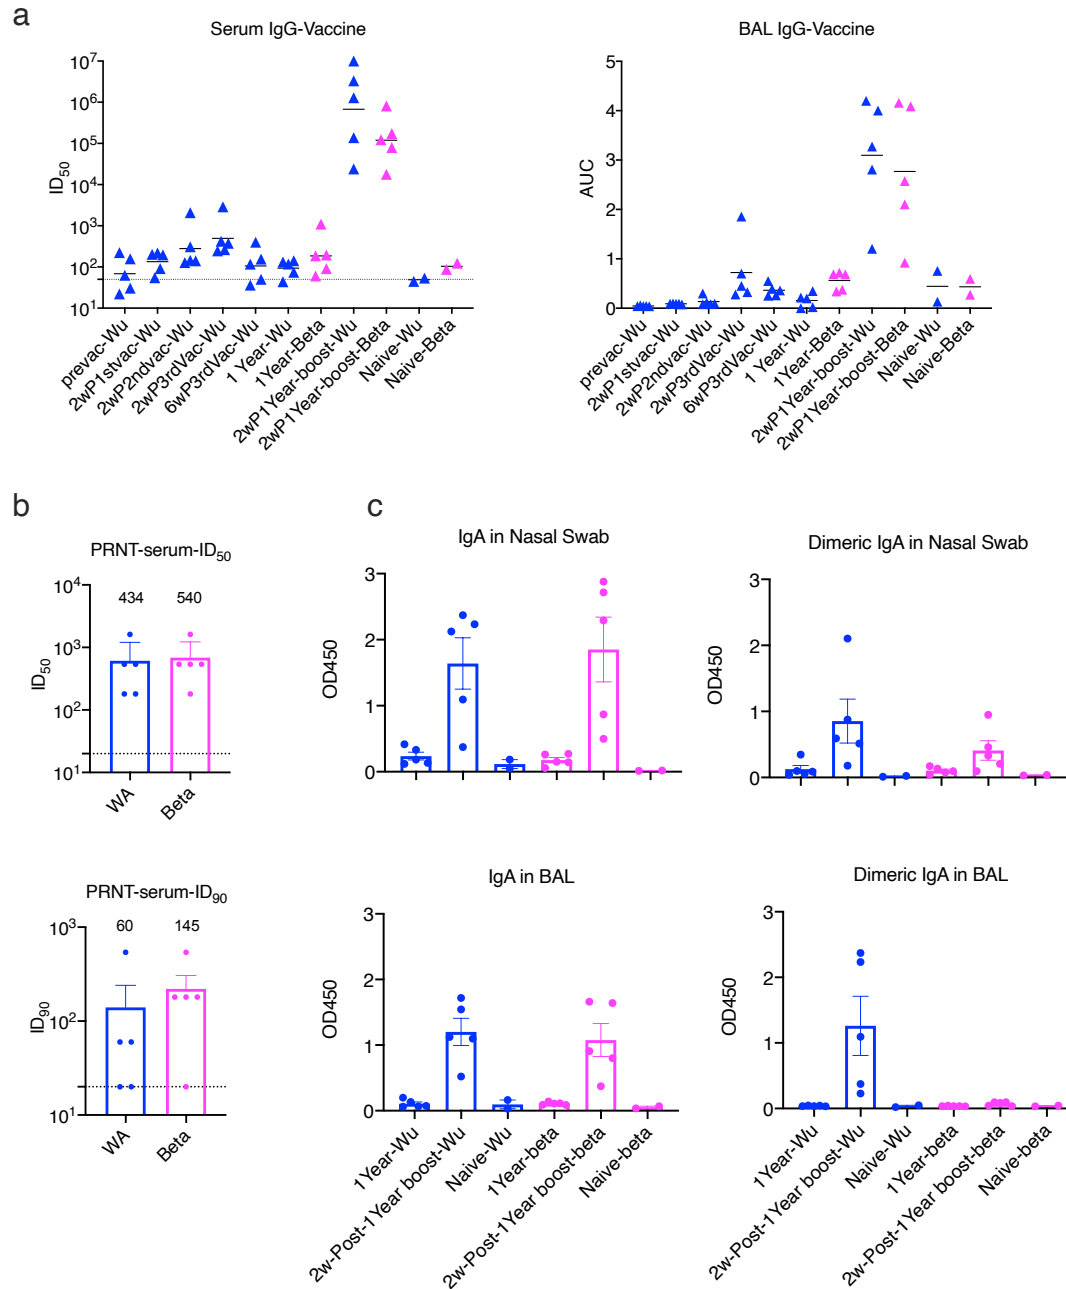

**Figure 2. Humoral immune responses against SARS-CoV-2 spike protein 1 (S1) in vaccinated macaques.** (a). the kinetics of S1-specific binding IgG titers in serum and BAL. Bars indicate geometric means of ID<sub>50</sub> and means of AUC. (b). PRNT titers in the serum samples of the vaccinated animals at 2-week after one-year boost. Geometric mean + geometric SD are shown. (c) S1-specific IgA and dimeric IgA responses in nasal swabs (NS) and BAL samples. WA: WA1/2020 D614G SARS-CoV-2 strain; Wu: Wuhan original strain; Beta: B.1.351 variant. The dashed lines indicate the detection limits. Data are shown as mean + SEM. Blue color indicates the S1 protein or the virus from Wuhan or WA strain, and magenta color indicates from beta variant.

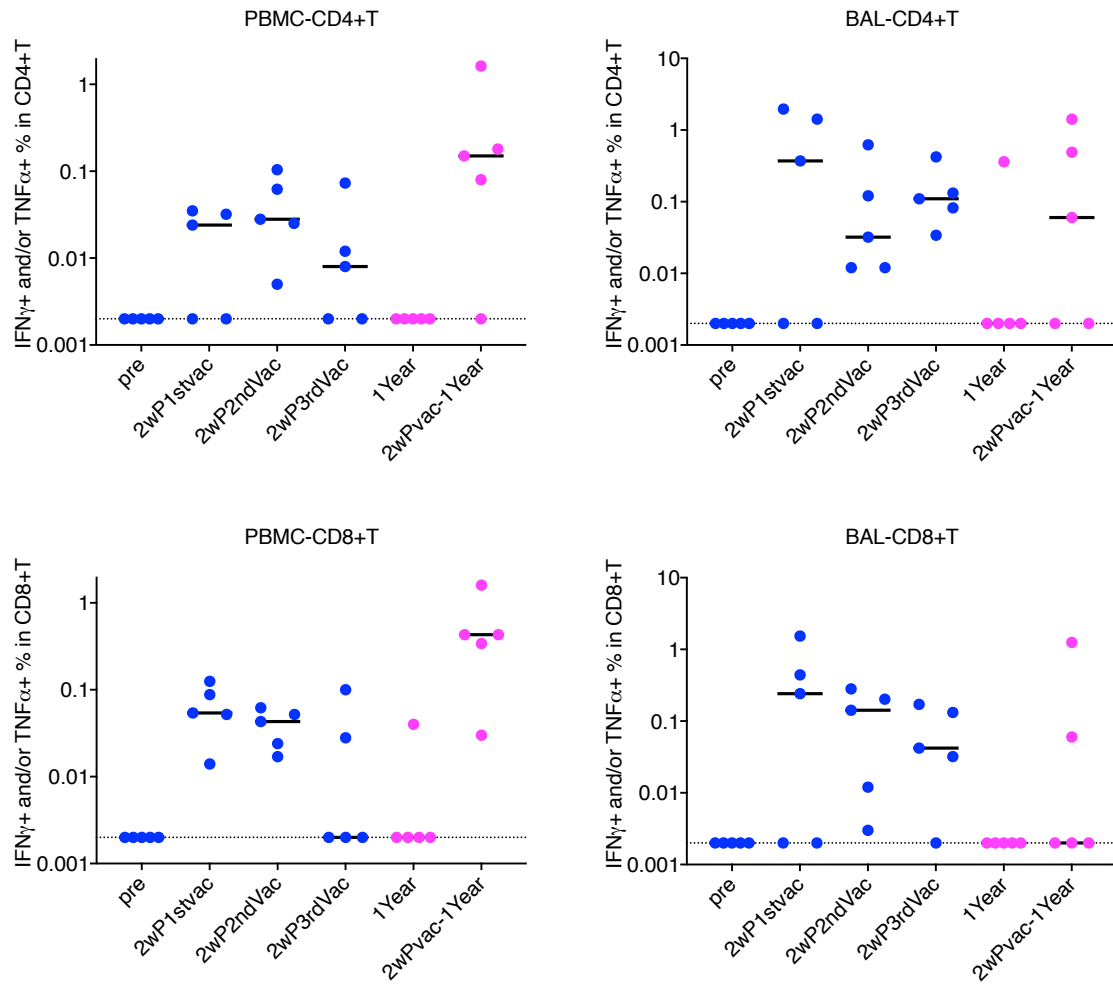

**Figure 3. T cell responses against SARS-COV-2 spike protein 1 (S1) in PBMC and BAL samples of the vaccinated macaques.** (a-b) The frequencies of IFN $\gamma$  and/or TNF $\alpha$ -producing CD4 $^+$  and CD8 $^+$  T cells were stained and measured after stimulation with S1 for 18 hrs in PBMC and BAL samples. Dashed lines indicate the detection limits. Bars indicate medians. Blue color indicates the S1 protein or the virus from Wuhan or WA strain, and magenta color indicates from beta variant.

a

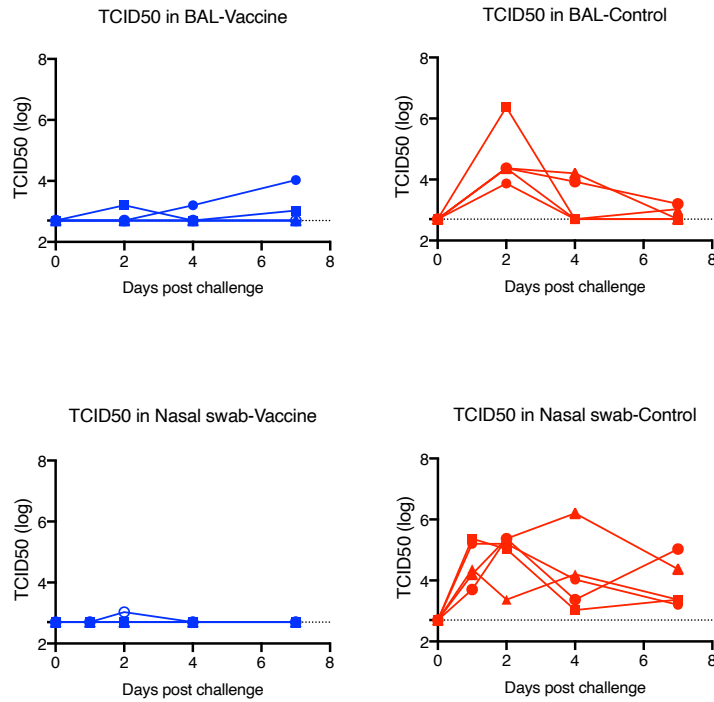

b

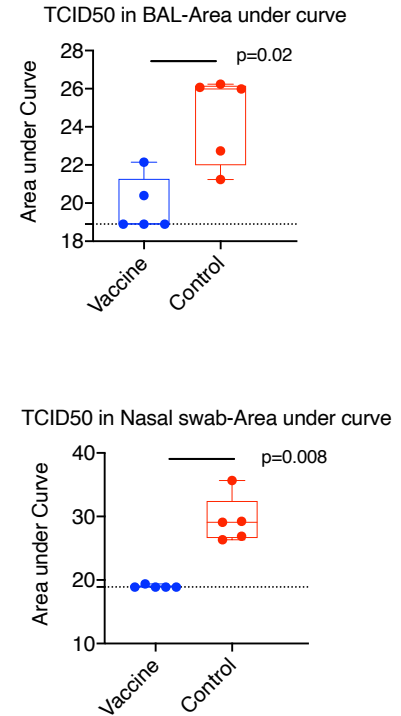

**Figure 4. Viral burden in the nasal swabs (NS) and BAL samples after SARS-CoV-2 beta variant intranasal and intratracheal challenges.** (a). TCID50 titer of the viral burdens in nasal swabs (NS) and BAL samples of individual animals (n=5 in the vaccine group and n=5 in the control group). (b). Area under curve (AUC) over time after challenge was calculated for each animal, representing total viral burdens. The total viral burdens were compared between vaccine and control groups in NS and BAL. Dashed lines indicate the detection limits. Box and whiskers with min to max were shown in the graph.

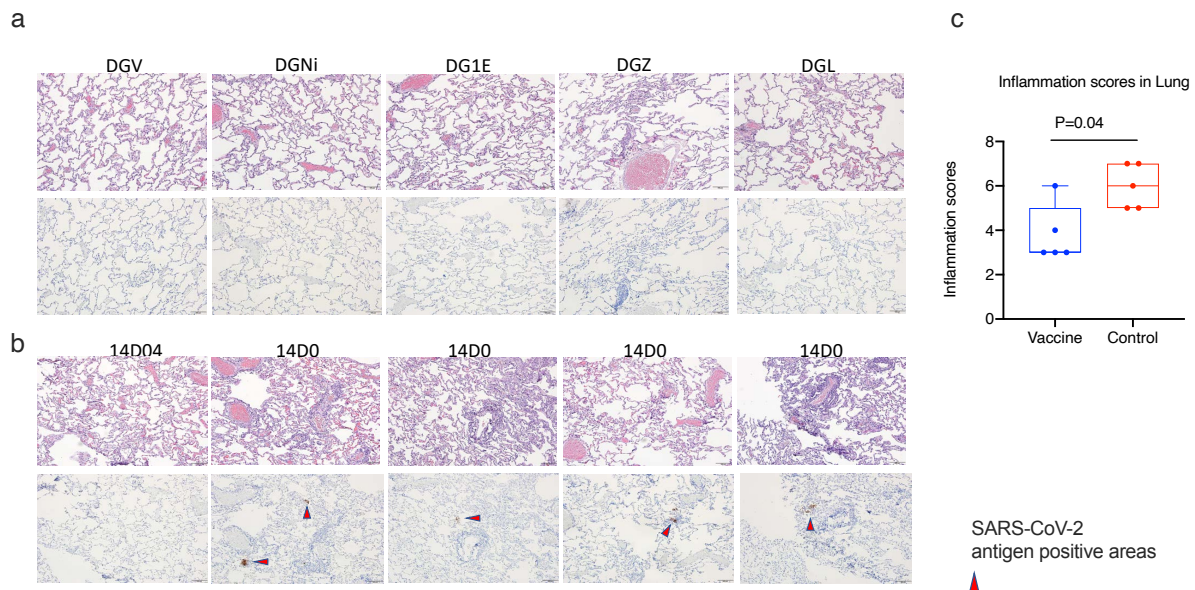

**Figure 5. Histopathology in the lungs at day 7 post SARS-CoV-2 challenge.** H&E and immunohistochemistry to detect SARS-COV-2 antigens were performed in the vaccinated(a) and naïve (b) animals. The upper rows of a-b were H&E staining, while the lower rows of a-b were immunohistochemistry of SARS-CoV-2 detection. All images 10x (scale bar= 100um). c). inflammation scores in the lung were compared between the vaccinated and naïve groups. Mann-Whitney test was used for comparison. Box and whiskers with min to max were shown in the graph.
